# Supplementary material for: Validation of the Pathogenic Effect of IGHMBP2 Gene Mutations Based on Yeast S. cerevisiae Model
Source: MDPI journal article supplement (doi:10.3390/ijms23179913), 2022-08-31
Supplement: s1 [file s1]

**Table S1.** The primer sequences for site directed mutagenesis.

| Mutation                  | Primer Forward                                                  | Primer Reverse                                                  |
|---------------------------|-----------------------------------------------------------------|-----------------------------------------------------------------|
| <i>IGHMBP2</i>            |                                                                 |                                                                 |
| c.151C>G<br>p.Gln51Glu    | GTTTGCTGAAGCTGGAGGTATCCAGCC<br>AG                               | CTGGCTGGATACCTCCAGCTTCAGCAA<br>AC                               |
| c.163C>T<br>p.Gln55*      | CAGGTATCCAGCTAGCGCACTGGGC                                       | GCCCAGTGCGCTAGCTGGATACCTG                                       |
| c.223G>A<br>p.Ala75Thr    | CGATACGGGTCCACGGCAGCTCTTC                                       | GAAGAGCTGCCGTGGACCCGTATCG                                       |
| c.G595C<br>p.Ala199Pro    | CCTCCCAGAAAGAACCGGTTTTATTTG<br>CGC                              | GCGCAAATAAAACCGGTTCTTTCTGGG<br>AGG                              |
| c.734A>G<br>p.Asn245Ser   | GCGCCCCCTCCAGCATCGCCGTGGAC                                      | GTCCACGGCGATGCTGGAGGGGGCGC                                      |
| c.767C>G<br>p.Ala256Gly   | GTGGAGCGCCTGGGTCTGTGTAAGCA<br>G                                 | CTGCTTACACAGACCCAGGCGCTCCA<br>C                                 |
| c.823A>G<br>p.Ile275Val   | CTCCTGGAGTCCGTTTCAGCAGCACTC                                     | GAGTGCTGCTGAACGGACTCCAGGAG                                      |
| c.1082T>C<br>p.Leu361Pro  | CCGATGGCCCCCGAAGTTGCTGCC                                        | GGCAGCAACTTCGGGGGGCCATCGG                                       |
| c.C1478T<br>p.Thr493Ile   | CTCTTGGTGGACATCGCCGGCTGCGG                                      | CCGCAGCCGGCGATGTCCACCAAGAG                                      |
| c.G1738A<br>p.Val580Ile   | GTGATACTGTCCTTCATCAGATCCAAC<br>AGG                              | CCTGTTGGATCTGATGAAGGACAGTAT<br>CAC                              |
| c.C1794A<br>p.Asn598Lys   | CCGGAGGATCAAAGTGGCTGTCACC                                       | GGTGACAGCCACTTTGATCCTCCGG                                       |
| <i>HCS1</i>               |                                                                 |                                                                 |
| c.G643C<br>p.Ala215Pro    | GAATGACTCCCAGAAAACCTCCCATTA<br>ATTTTGCCATTAAAC                  | GTAAATGGCAAAATTAATGGGAGTTTT<br>CTGGGAGTCATTC                    |
| c.CG1574TC<br>p.Thr525Ile | CAAAAATTCCTTTAATTTGGTATGATA<br>TCCAAGGTGATGAATTTCAAGAGACT<br>GC | GCAGTCTCTTGAAATTCATCACCTTGG<br>ATATCATACCAAATTAAGGAATTTTT<br>G  |
| c.G1846A<br>p.Val616Ile   | GAAAAAGATGTTATCATATTGAGTTTA<br>ATTCGTAGCAATGAAAAATTTGAAGTT<br>G | CAACTTCAAATTTTTCATTGCTACGAA<br>TTAAACTCAATATGATAACATCTTTTT<br>C |
| c.C1902A<br>p.Asn634Lys   | GAAGAACGAAGACTGAAAGTCGCCAT<br>GACAAGAC                          | GTCTTGTCATGGCGACTTTCAGTCTTCG<br>TTCTTC                          |

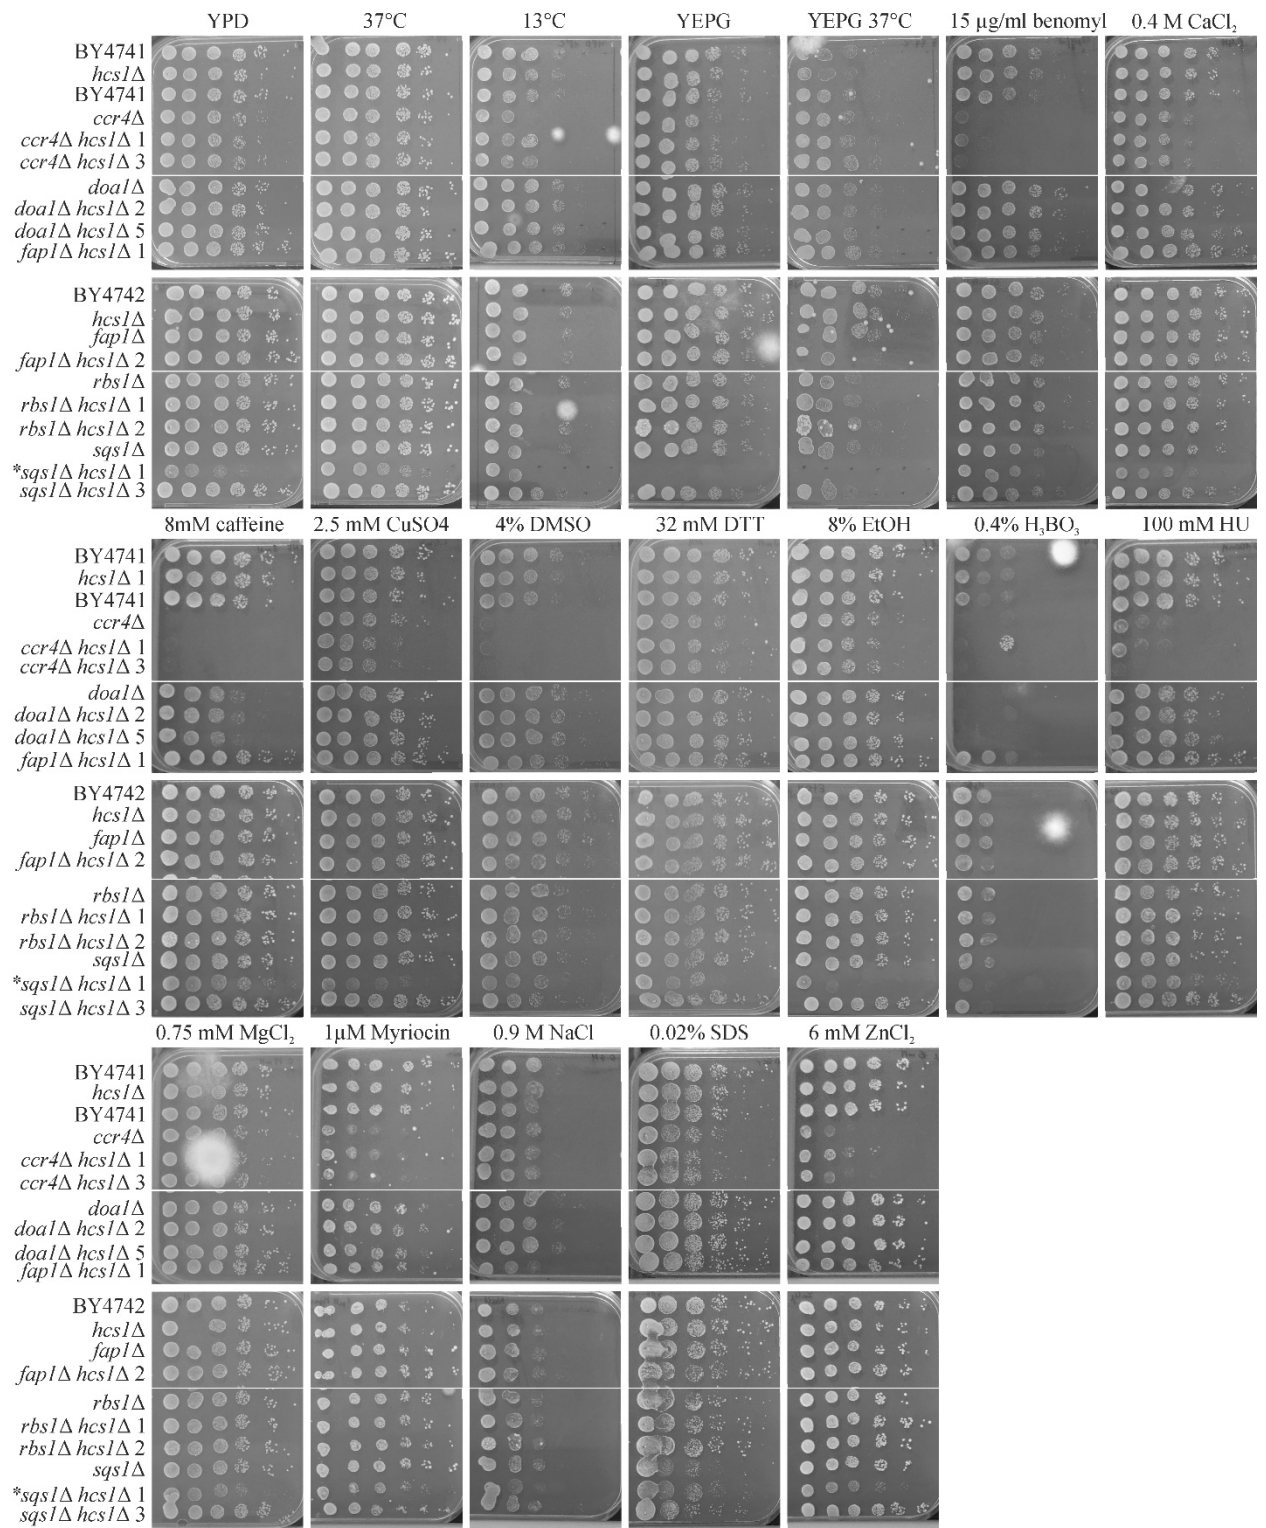

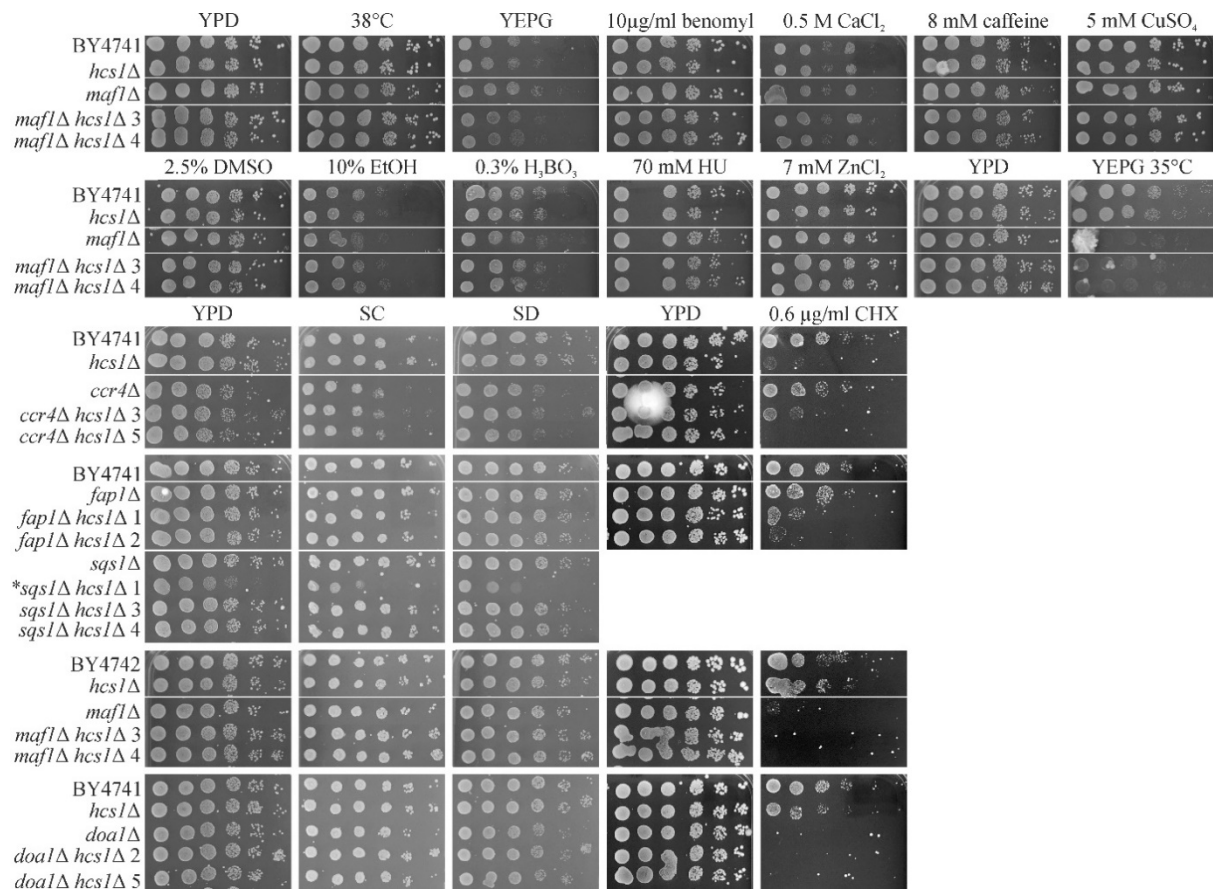

**Figure S1.** Growth of wild-type (BY4741 or BY4742 strain) and different mutant strains, in various conditions. The yeast cells were grown overnight in YPD medium, diluted to OD<sub>600</sub> ≈ 1 and ten-fold serial dilutions were spotted on YPD, YEPG, SD, SC or YPD medium with indicated supplements. Respiratory deficient strains are indicated by \*.

|         |     |         |          |         |      |      |          |          |         |     |
|---------|-----|---------|----------|---------|------|------|----------|----------|---------|-----|
|         |     | A199    |          |         |      | T493 |          |          |         |     |
|         |     |         |          |         |      |      |          |          |         |     |
| IGHMBP2 | 192 | LDTSQKE | <b>A</b> | VLFALSQ | 206  | 486  | VPLLLVD  | <b>T</b> | AGCGLFE | 500 |
| Hcs1    | 208 | LNDSQKT | <b>A</b> | INFAINN | 222  | 518  | IPLIWYD  | <b>T</b> | QGDEFQE | 532 |
|         |     | *:      | ***      | *:      | **:: |      | ::**:    | **       | *       | : * |
|         |     |         |          |         |      |      |          |          |         |     |
|         |     | A215    |          |         |      | T525 |          |          |         |     |
|         |     | V580    |          |         |      | N598 |          |          |         |     |
|         |     |         |          |         |      |      |          |          |         |     |
| IGHMBP2 | 573 | EAVILSF | <b>V</b> | RSNRKGE | 587  | 591  | LAEDRRIN | <b>V</b> | AVTRAR  | 605 |
| Hcs1    | 609 | DVIILSL | <b>V</b> | RSNEKFE | 623  | 627  | LKEERRLN | <b>V</b> | AMTRPR  | 641 |
|         |     | ::**:   | ***      | ::***:  | * *  |      | * *::**: | ***      | ::**    | : * |
|         |     |         |          |         |      |      |          |          |         |     |
|         |     | V616    |          |         |      | N634 |          |          |         |     |

**Figure S2.** The homology of regions containing the amino acids residues conserved between human IGHMBP2 and yeast Hcs1 proteins, which are substituted in patients (Ala199Pro, Thr493Ile, Val580Ile and Asn598Lys; in yeast respectively: Ala215Pro, Thr525Ile, Val616Ile and Asn634Lys). Alignment was prepared using Clustal Omega tool (EMBL-EBI).
